# Supplementary material for: Transcriptome, proteome, and protein synthesis within the intracellular cytomatrix
Source: PubMed Central journal article supplement (PMC9941065; doi:10.1016/j.isci.2023.105965), 2023-01-13
Supplement: mmc1.pdf [file mmc1.pdf]

## **Supplemental information**

### **Transcriptome, proteome, and protein**

### **synthesis within the intracellular cytomatrix**

**Tattym E. Shaiken, Sandra L. Grimm, Mohamad Siam, Amanda Williams, Abdol-Hossein Rezaeian, Daniel Kraushaar, Emily Ricco, Matthew J. Robertson, Cristian Coarfa, Antrix Jain, Anna Malovannaya, Fabio Stossi, Antone R. Opekun, Alyssa P. Price, and Julien Dubrulle**

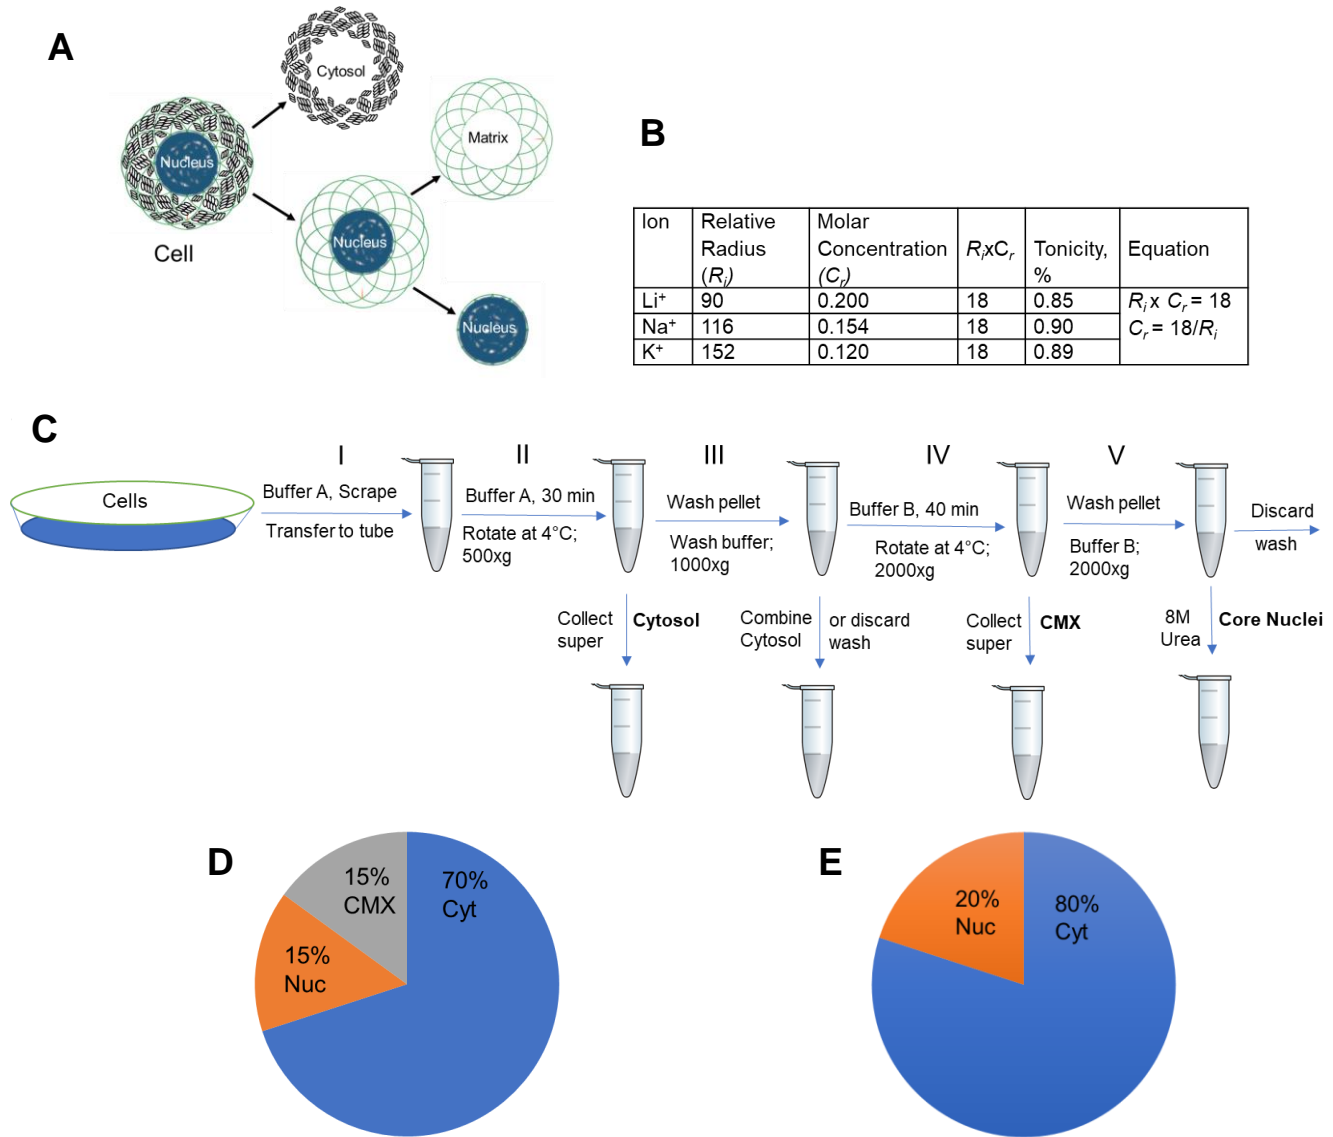

**Figure S1. Cellular fractionation and isolation of the cytomatrix, related to Figure 1. (A)** Schematic depiction of cell fractionation. **(B)** Equation for ion concentration calculation. **(C)** Diagram illustrating biochemical fractionation technique in a series of steps: I – washing cells with cold PBS, adding Buffer A, scraping cells, and transferring lysate to tubes; II – Incubation in Buffer A for 30 min in 4°C and collection of the supernatant as the cytosolic fraction; III – washing pellet with wash buffer (Buffer A no detergent); IV- Incubation in Buffer B for 40 min in 4°C and collection of the supernatant as a CMX; V – washing pellet with buffer B and dissolving it in 8M Urea for obtaining the core nuclear fraction. **(D)** Distribution of total cellular proteins in the cytosol (blue), CMX (gray), and nucleus (red). **(E)** Ratio of proteins in the cytosol and nuclear fractions extracted by cell lysis method. Cells were fractionated, and the total proteins were measured in each fraction to calculate the ratio. The protein percentage for each region was determined by dividing the protein found in each fraction by the total protein.

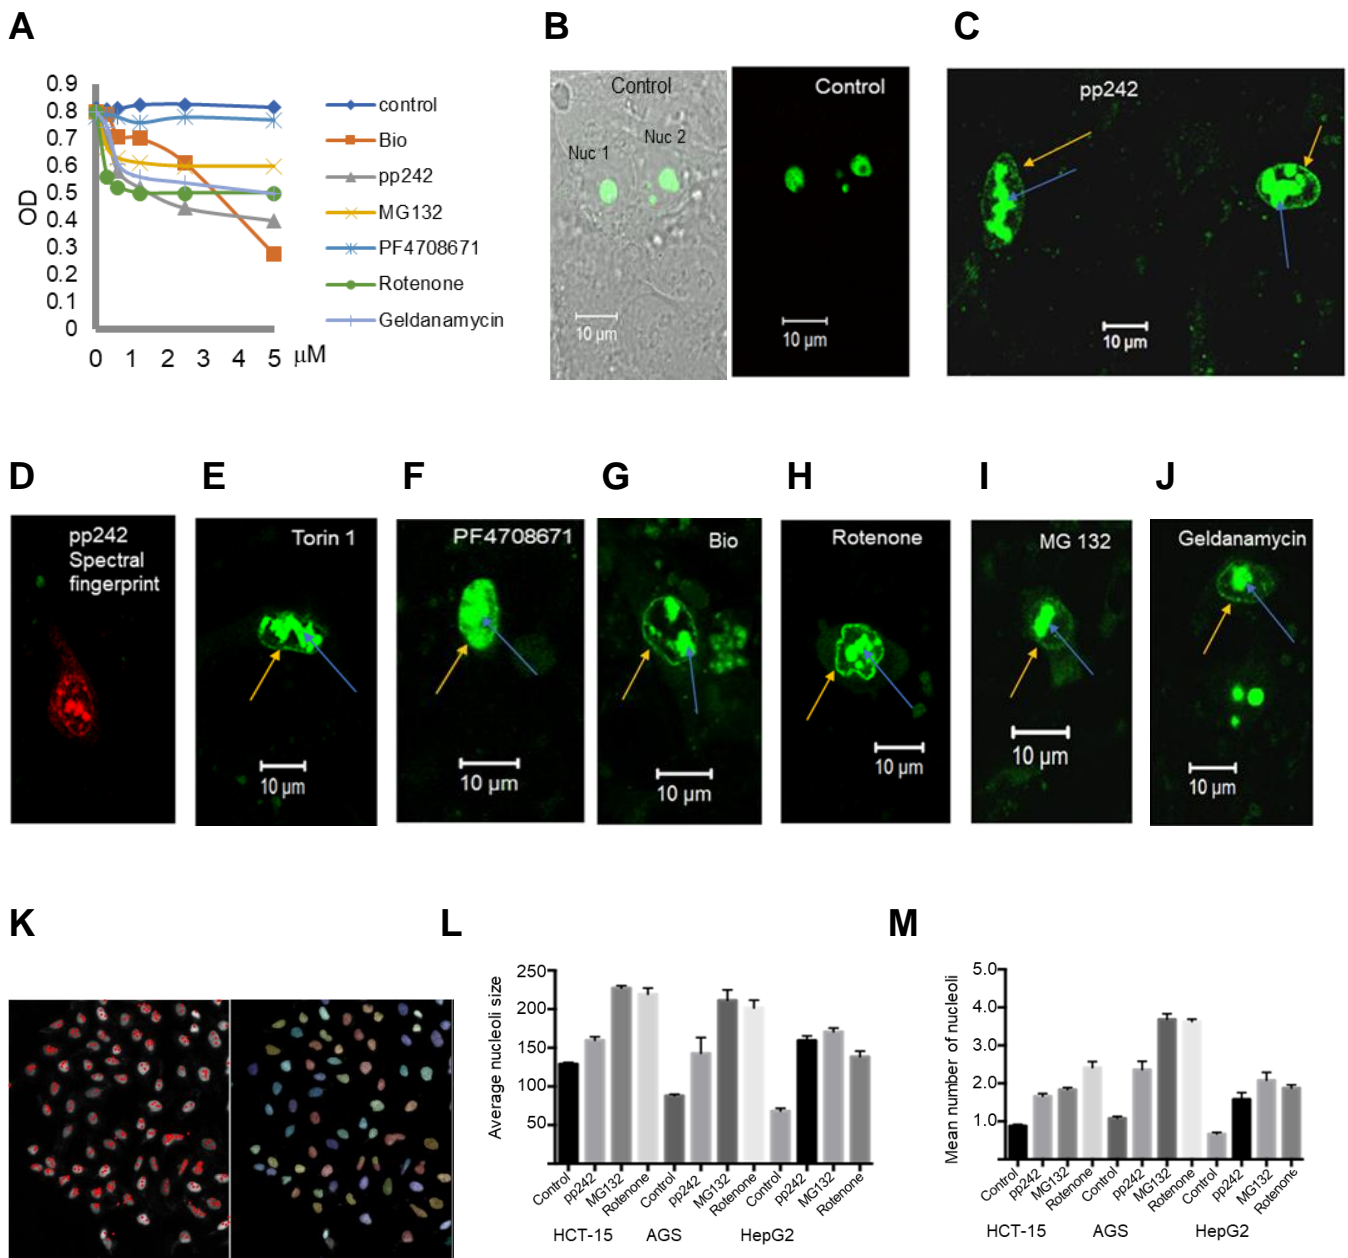

**Figure S2. Effect of different compounds on HCT-15 cell growth and ribosomal L7a localization, related to Figure 2. (A)** MTT cell growth test. **(B-J)** A live cell confocal microscopy image of cells transfected with the GFP-L7a vector pCMV6-AC-GFP. Perinuclear protein accumulation (yellow arrows) and nucleolar hypertrophy (blue arrows) were observed post drug treatment. **(B)** no treatment. Inhibitors: **(C)** mTOR, pp242, **(D)** spectral fingerprinting of rpL7a at 510 nm (for pp242) is a uniform spectral line resulting from light's emission in a narrow frequency range, compared with the nearby frequencies used to identify molecules. **(E)** mTOR, Torin 1, **(F)** RSK, PF-4708671, **(G)** GSK-3, Bio, **(H)** Rotenone, mitochondrial electron transport, **(I)** 26S proteasome, MG132, **(J)** Hsp90, Geldanamycin. **(K – M)** High-throughput nucleolar hypertrophy test in 384-well plates. **(K)** Using MatLab algorithm HCT-15 cell nuclei were highlighted to identify the size and number of nucleoli. **(L)** Average nucleolar size. **(M)** Mean number of nucleoli per nucleus. At least 200 cell nuclei were analyzed with four repeats. Data are given as means  $\pm$  SD,  $p < 0.001$ . Treatment time was 5 hours. HCT-15 cells were imaged on an IC200 high-throughput image cytometer (VALA Sciences). Image analysis was performed using a custom-made algorithm developed in MatLab.

**A**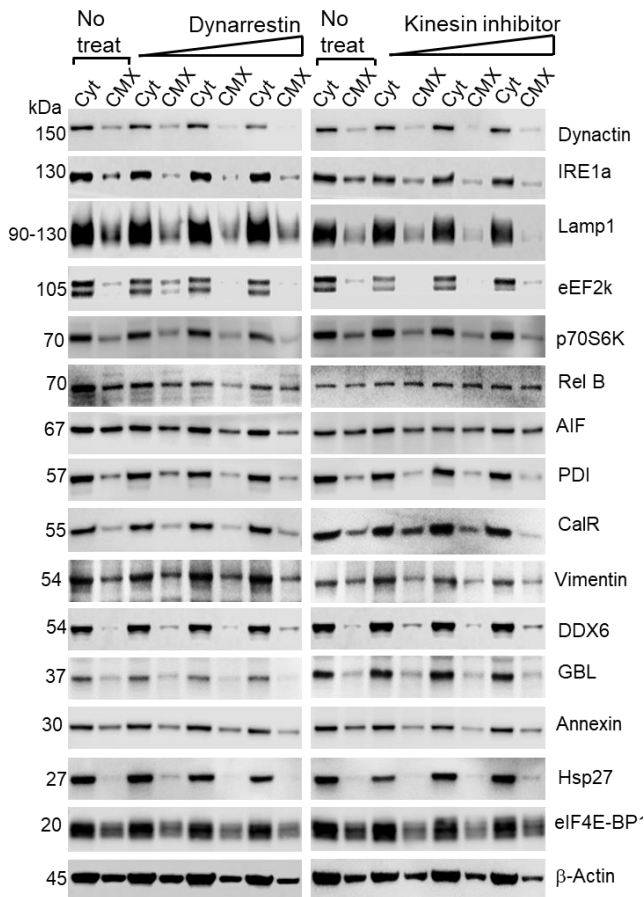**B**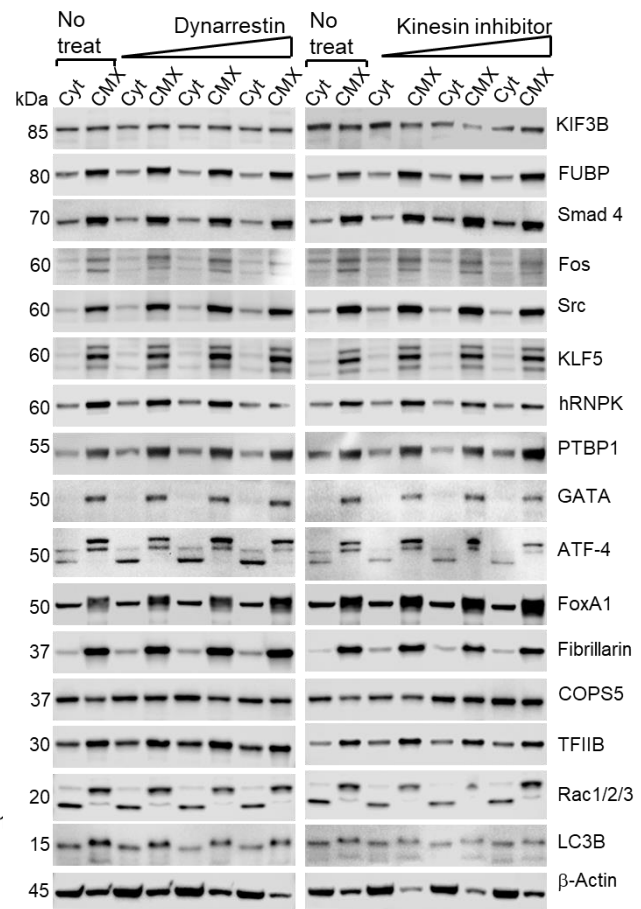**C**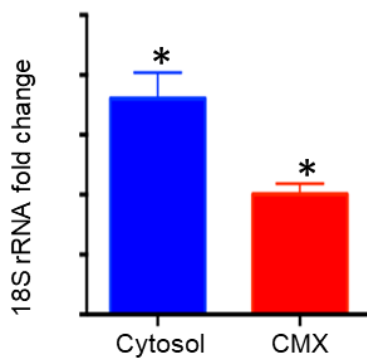**D**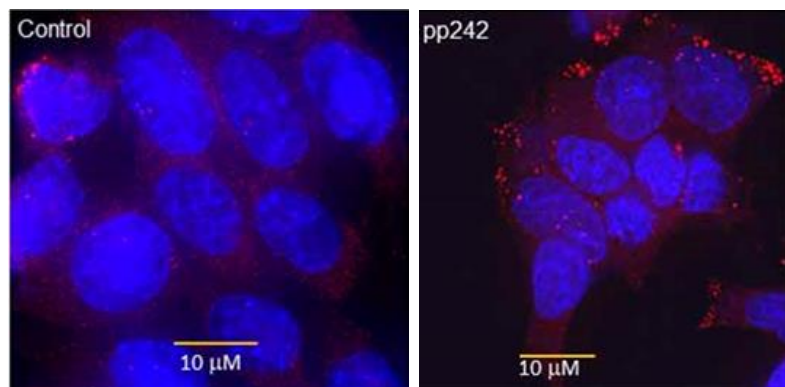

**Figure S3. Analysis of protein synthesis in the HCT-15 cell compartments, related to Figure 2. (A, B)** Effects of kinesin and dynein inhibitors. **(A)** Cytosolic, **(B)** Cytomatrix or mixed proteins. Effects of both inhibitors are minimal. **(C, D)** RT-PCR of 18S rRNA and S6 mRNA FISH. **(C)** RT-PCR of ribosomal large subunit 18SRNA; Data represent the mean  $\pm$ SD (n = 3). \*p < 0.05. **(D)** FISH images of ribosomal S6 mRNA in normal growth condition and pp242 treated cells.

**A**

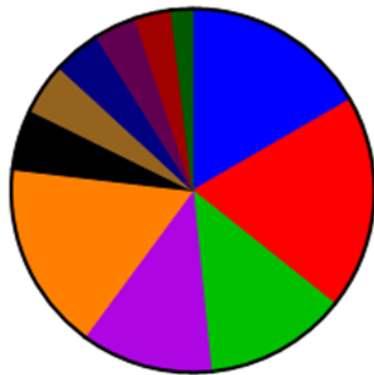

- cytoskeleton/membrane organization
- enzymes
- signal transducers, receptors
- transport, trafficking
- RNA binding and processing
- UB and sumo signaling
- tumor suppressors, oncogenes, tyrosine kinases
- protein kinases, phosphatases
- DNA, chromatin binding
- protein synthesis
- glycosylation, lipid binding

Cytomatrix, Total 6012

**B**

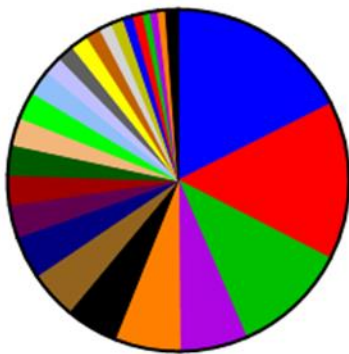

- transferase
- peptidase, caspase, cathepsin
- dehydrogenase
- synthase
- hydrolase
- reductase
- proteasome 26S subunit
- tRNA synthetase
- oxidase, peroxidase, dismutase
- isomerase
- nucleotide metabolism
- lipase, phospholipase
- esterase
- E3 ubiquitin protein ligase
- carboxylase, decarboxylase
- ligase
- lyase
- nuclease
- helicase
- cyclase
- deaminase
- epimerase
- dioxygenase
- sulfatase
- enolase
- dehydratase, hydratase, aldolase

Cytosol, Total 421

**Figure S4. Pie charts of the HCT-15 cell proteome, related to Figure 3. (A) CMX proteome distribution categorized by function. (B) The cytosolic enzyme spectrum.**

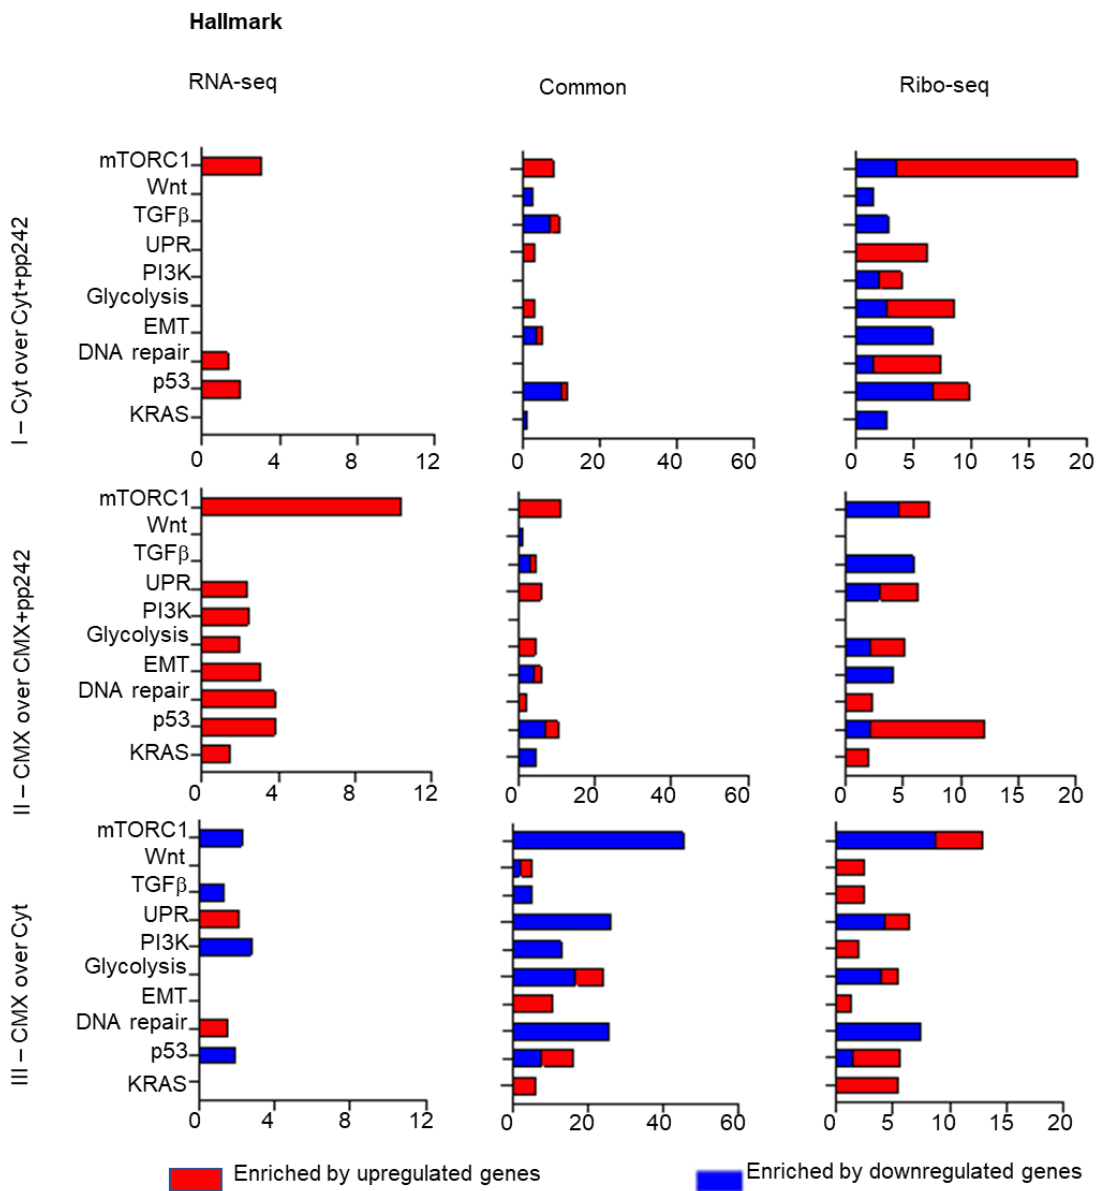

**Figure S5. ORA analysis of transcription and translation of HCT-15 cells, related to Figure 4.** Hallmark pathway visualization of the enriched upregulated and downregulated differentially expressed gene sets.

**A**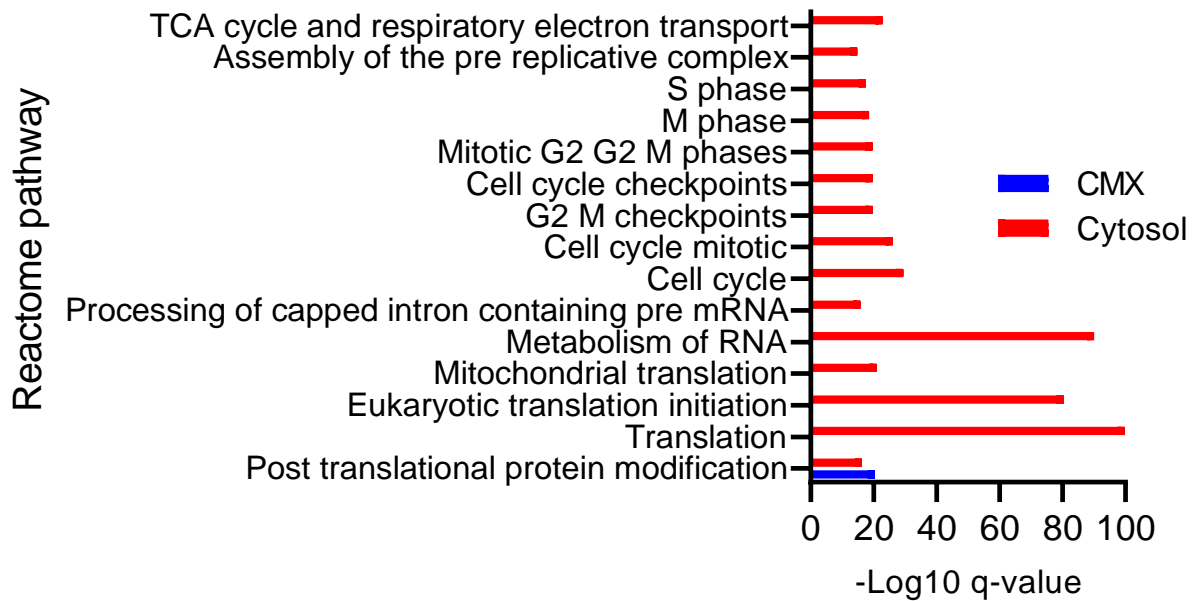**B**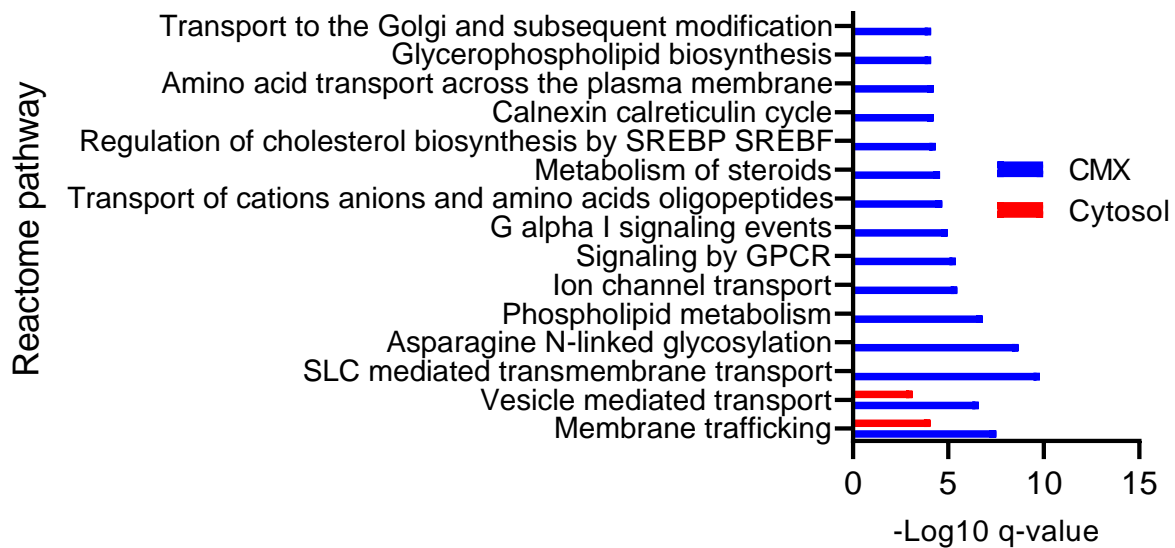

**Figure S6. Reactome pathway analysis of HCT-15 cells, related to Figure 4.**

Upregulated pathways were identified through ribosome footprint. **(A)** cytosol; **(B)** cytomatrix.

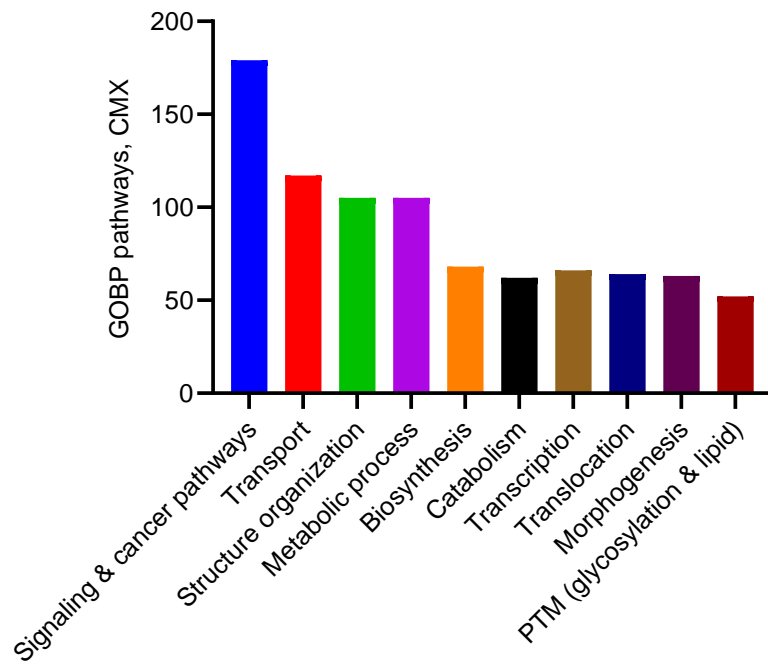

**Figure S7. GOBP pathway analysis of HCT-15 cells, related to Figure 5.**

Numbers of upregulated specific pathways in CMX.



**Table S8. Reactome Pathway differences, related to Figure 4**

| <b>Upregulated Pathways CMX over Cytosol</b>                | <b>-log<sub>10</sub>(pValue)</b> |         |
|-------------------------------------------------------------|----------------------------------|---------|
| <b>CMX Pathway Name</b>                                     | Ribo-seq                         | RNA-seq |
| SLC mediated transmembrane transport                        | 9.80                             | 1.81    |
| Asparagine N-linked glycosylation                           | 8.68                             | 2.53    |
| Membrane trafficking                                        | 7.50                             | 2.44    |
| Signaling by receptor tyrosine kinases                      | 7.26                             |         |
| Phospholipid metabolism                                     | 6.80                             |         |
| Vesicle mediated transport                                  | 6.59                             | 2.01    |
| Ion channel transport                                       | 5.47                             |         |
| Signaling by GPCR                                           | 5.39                             |         |
| GPCR ligand binding                                         | 5.08                             |         |
| Transport of cations anions and amino acids oligopeptides   | 4.67                             |         |
| Class 1 rhodopsin like receptors                            | 4.67                             |         |
| Metabolism of steroids                                      | 4.56                             |         |
| Regulation of cholesterol biosynthesis by SREBP SREBF       | 4.34                             |         |
| Intracellular signaling by second messengers                | 4.26                             |         |
| Calnexin/calreticulin cycle                                 | 4.23                             |         |
| Amino acid transport across the plasma membrane             | 4.22                             |         |
| Glycerophospholipid biosynthesis                            | 4.10                             |         |
| Transport to the Golgi and subsequent modification          | 4.10                             |         |
| Activation of gene expression by SREBF SREBP                | 4.08                             |         |
| Rho GTPase cycle                                            | 4.05                             |         |
| Regulation of lipid metabolism by PPAR-alpha                | 4.05                             |         |
| N-glycan trimming in the ER and calnexin/calreticulin cycle | 4.05                             |         |
| Sphingolipid metabolism                                     | 3.94                             |         |
| Glycosaminoglycan metabolism                                | 3.86                             |         |
| Sphingolipid de novo biosynthesis                           | 3.86                             |         |

**Table S9. Reactome Pathway differences, related to Figure 4**

| <b>Upregulated Pathways CMX over CMX pp242</b>                        | <b>-log<sub>10</sub>(pValue)</b> |                |
|-----------------------------------------------------------------------|----------------------------------|----------------|
| <b>CMX Pathway Name</b>                                               | <b>Ribo-seq</b>                  | <b>RNA-seq</b> |
| Respiratory electron transport ATP synthesis by chemiosmotic coupling | 8.44                             |                |
| The citric acid TCA cycle and respiratory electron transport          | 7.45                             |                |
| Mitochondrial translation                                             | 7.38                             |                |
| Respiratory electron transport                                        | 6.22                             |                |
| Translation                                                           | 6.05                             |                |
| Metabolism of RNA                                                     | 5.87                             |                |
| Cell cycle                                                            | 5.81                             |                |
| DNA repair                                                            | 5.33                             |                |
| Signaling by rho GTPases                                              | 5.32                             |                |
| Telomere maintenance                                                  | 4.91                             |                |
| Protein localization                                                  | 4.72                             |                |
| Chromosome maintenance                                                | 4.72                             |                |
| Inhibition of DNA recombination at telomere                           | 4.53                             |                |
| mRNA splicing                                                         | 4.31                             |                |
| Cell cycle mitotic                                                    | 4.31                             |                |
| HDACs deacetylate histones                                            | 4.24                             |                |
| M phase                                                               | 4.04                             |                |
| RNA polymerase I transcription                                        | 3.99                             |                |
| G2/M checkpoints                                                      | 3.70                             |                |
| Base excision repair ap site formation                                | 3.63                             |                |
| Amyloid fiber formation                                               | 3.57                             |                |
| Processing of DNA double strand break ends                            | 3.54                             |                |
| Homology directed repair                                              | 3.42                             |                |
| Formation of the beta catenin TCF transactivating complex             | 3.29                             |                |
| Rho GTPases activate PKNS                                             | 3.21                             |                |

**Table S10. Reactome Pathway differences, related to Figure 4**

| Upregulated Pathways Cytosol over Cytosol pp242<br>Cytosol Pathway Name | -log <sub>10</sub> (pValue) |         |
|-------------------------------------------------------------------------|-----------------------------|---------|
|                                                                         | Ribo-seq                    | RNA-seq |
| Translation                                                             | 99.87                       |         |
| Metabolism of RNA                                                       | 90.10                       | 1.57    |
| Eukaryotic translation initiation                                       | 80.38                       |         |
| rRNA processing                                                         | 71.99                       |         |
| Regulation of expression of Slits and Robos                             | 70.09                       |         |
| Eukaryotic translation elongation                                       | 67.14                       |         |
| Response of eIF2ak4 GCN2 to amino acid deficiency                       | 65.56                       |         |
| Signaling by Robo receptors                                             | 65.48                       |         |
| SRP dependent co-translational protein targeting to membrane            | 63.29                       |         |
| Cellular responses to external stimuli                                  | 61.81                       |         |
| Metabolism of amino acids and derivatives                               | 57.67                       |         |
| Nonsense mediated decay NMD                                             | 57.67                       |         |
| Activation of the mRNA upon binding of the cap binding complex          | 31.59                       |         |
| Cell cycle                                                              | 29.44                       | 1.31    |
| Cell cycle mitotic                                                      | 26.10                       |         |
| The citric acid TCA cycle and respiratory electron transport            | 22.83                       |         |
| Mitochondrial translation                                               | 20.94                       |         |
| G2-M checkpoints                                                        | 19.72                       |         |
| Cell cycle checkpoints                                                  | 19.65                       |         |
| Mitotic G2-G2/M phases                                                  | 19.65                       |         |
| DNA replication                                                         | 18.97                       |         |
| M phase                                                                 | 18.54                       |         |
| Respiratory electron transport ATP synthesis by chemiosmotic coupling   | 18.30                       |         |
| DNA replication preinitiation                                           | 18.03                       |         |
| DNA repair                                                              | 18.03                       |         |

**Table S11. Reactome Pathway differences CMX pp242 and CMX, related to Figure 4**

| Ribo-seq Unique Upregulated Pathways                                | -log <sub>10</sub> (pValue) |      |
|---------------------------------------------------------------------|-----------------------------|------|
|                                                                     | CMX pp242                   | CMX  |
| CMX Pathway Name                                                    | CMX pp242                   | CMX  |
| SLC mediated transmembrane transport                                | 2.50                        | 9.80 |
| Asparagine N-linked glycosylation                                   |                             | 8.68 |
| Membrane trafficking                                                | 2.47                        | 7.50 |
| Signaling by receptor tyrosine kinases                              | 2.26                        | 7.26 |
| Vesicle mediated transport                                          | 1.90                        | 6.59 |
| Ion channel transport                                               | 2.93                        | 5.47 |
| Signaling by GPCR                                                   |                             | 5.39 |
| GPCR ligand binding                                                 |                             | 5.08 |
| G $\alpha$ -I-signaling events                                      |                             | 4.95 |
| Transport of inorganic cations anions and amino acids oligopeptides |                             | 4.67 |
| Metabolism of steroids                                              |                             | 4.56 |
| Regulation of cholesterol biosynthesis by SREBP SREBF               |                             | 4.34 |
| Calnexin/calreticulin cycle                                         |                             | 4.23 |
| Amino acid transport across the plasma membrane                     |                             | 4.22 |
| Transport to the Golgi and subsequent modification                  |                             | 4.10 |
| Activation of gene expression by SREBF SREBP                        |                             | 4.08 |
| Regulation of lipid metabolism by PPAR $\alpha$                     |                             | 4.05 |
| N-glycan trimming in the ER and calnexin calreticulin cycle         |                             | 4.05 |
| Glycosaminoglycan metabolism                                        | 1.34                        | 3.86 |
| Sphingolipid de novo biosynthesis                                   |                             | 3.86 |
| Ion homeostasis                                                     |                             | 3.83 |
| COPII mediated vesicle transport                                    |                             | 3.48 |
| O-linked glycosylation of mucins                                    |                             | 3.26 |
| ER quality control compartment ERQC                                 |                             | 3.20 |
| ER to Golgi anterograde transport                                   |                             | 3.11 |

**Table S12. GOBP Pathway differences and overlaps of the cytosol and CMX, related to Figure 4**

| Ribo-seq Unique Upregulated Pathways,<br>relative CMX | -log <sub>10</sub> (pValue) |         |                  |
|-------------------------------------------------------|-----------------------------|---------|------------------|
|                                                       | CMX/CMX<br>pp242            | CMX/Cyt | Cyt/Cyt<br>pp242 |
| Lipid metabolic process                               | 17.16                       | 30.78   | 5.95             |
| Transmembrane transport                               | 22.56                       | 30.58   | 5.56             |
| Cell-cell signaling                                   | 10.07                       | 29.04   | 5.87             |
| Cellular lipid metabolic process                      | 18.70                       | 28.93   | 5.03             |
| Lipid biosynthetic process                            | 12.55                       | 21.28   | 1.58             |
| Regulation of transport                               | 17.79                       | 21.25   | 5.28             |
| Glycoprotein metabolic process                        | 3.64                        | 20.43   |                  |
| Regulation of developmental process                   | 11.02                       | 18.65   | 3.64             |
| Negative regulation of signaling                      | 11.12                       | 17.82   | 4.33             |
| Cation transport                                      | 13.85                       | 17.65   |                  |
| Glycoprotein biosynthetic process                     | 3.51                        | 17.47   |                  |
| Cell morphogenesis                                    | 14.26                       | 15.76   | 3.03             |
| Receptor protein signaling pathway                    | 7.13                        | 15.74   |                  |
| Chemical homeostasis                                  | 11.02                       | 15.57   |                  |
| Actin filament-based process                          | 5.58                        | 15.55   | 1.69             |
| Cation transmembrane transport                        | 11.47                       | 15.34   | 1.42             |
| Cell migration                                        | 6.80                        | 14.86   |                  |
| Glycosylation                                         | 3.68                        | 14.69   |                  |
| Glycerolipid metabolic process                        | 9.20                        | 14.48   | 2.26             |
| Cellular component morphogenesis                      | 11.90                       | 14.18   | 2.27             |
| Phospholipid metabolic process                        | 10.18                       | 13.52   | 2.43             |
| Regulation of cellular component movement             | 4.11                        | 13.41   |                  |
| Negative regulation of developmental process          | 4.47                        | 13.22   |                  |
| Lipid localization                                    | 5.03                        | 13.08   |                  |
| Cell part morphogenesis                               | 10.71                       | 12.75   | 1.95             |

**Table S13. GOBP Pathway differences and overlaps of the cytosol and CMX, related to Figure 4**

| Ribo-seq Unique Upregulated Pathways,<br>relative to cytosol | -log <sub>10</sub> (pValue) |         |                  |
|--------------------------------------------------------------|-----------------------------|---------|------------------|
|                                                              | CMX/CMX<br>pp242            | CMX/Cyt | Cyt/Cyt<br>pp242 |
| mRNA catabolic process                                       | 2.45                        |         | 68.78            |
| ncRNA metabolic process                                      |                             |         | 62.77            |
| Co-translational protein targeting to membrane               | 1.33                        | 2.99    | 59.98            |
| Protein localization to endoplasmic reticulum                |                             | 2.51    | 55.64            |
| mRNA catabolic process nonsense mediated decay               | 1.39                        | 3.40    | 54.43            |
| Nuclear transcribed mRNA catabolic process                   | 2.80                        | 4.19    | 50.56            |
| Protein localization to endoplasmic reticulum                | 1.74                        | 3.66    | 48.86            |
| ncRNA processing                                             |                             |         | 42.96            |
| Ribosome biogenesis                                          |                             |         | 36.24            |
| Endopeptidase activity involved in apoptotic process         | 1.43                        |         | 36.18            |
| Ribonucleoprotein complex subunit organization               |                             |         | 34.84            |
| Protein modification by ubiquitination                       |                             |         | 32.14            |
| RNA processing                                               |                             |         | 31.85            |
| Cell cycle G2/M phase transition                             | 3.00                        |         | 30.92            |
| rRNA metabolic process                                       |                             |         | 29.97            |
| Nucleoside triphosphate biosynthetic process                 | 5.31                        |         | 21.19            |
| Nucleosome assembly                                          | 4.36                        |         | 19.46            |
| Spliceosomal complex assembly                                |                             |         | 18.59            |
| Fatty acyl Co-A biosynthetic process                         |                             |         | 16.34            |
| tRNA pseudouridine synthesis                                 |                             |         | 15.25            |
| Inner mitochondrial membrane organization                    | 4.41                        |         | 13.97            |
| Negative regulation of steroid metabolic process             |                             | 1.51    | 13.94            |
| Nucleoside metabolic process                                 | 2.55                        |         | 13.89            |
| Microtubule polymerization or depolymerization               | 3.84                        | 1.42    | 13.85            |
| Protein ADP ribosylation                                     |                             |         | 13.52            |

**Table S14. GOBP Ribo-seq and RNA-seq Pathway differences and overlaps, related to Figure 4**

| Upregulated Pathways                            | -log <sub>10</sub> (pValue) |         |          |         |             |         |
|-------------------------------------------------|-----------------------------|---------|----------|---------|-------------|---------|
|                                                 | CMX/CMXpp242                |         | CMX/Cyt  |         | Cyt/Cytp242 |         |
|                                                 | Ribo-seq                    | RNA-seq | Ribo-seq | RNA-seq | Ribo-seq    | RNA-seq |
| Cellular macromolecule localization             | 30.99                       | 3.88    | 24.59    | 8.68    | 58.68       |         |
| Cell projection organization                    | 27.46                       | 4.24    | 15.98    | 4.94    | 6.78        | 1.67    |
| Establishment of protein localization           | 27.16                       | 6.77    | 29.04    | 8.44    | 51.78       |         |
| Transmembrane transport                         | 22.56                       | 10.19   | 30.58    | 5.48    | 5.56        | 4.83    |
| Protein containing complex subunit organization | 22.19                       | 4.28    | 11.63    | 5.41    | 67.29       |         |
| Carbohydrate derivative metabolic process       | 20.87                       | 8.92    | 20.85    | 5.88    | 14.41       |         |
| Cellular lipid metabolic process                | 18.70                       | 4.12    | 28.93    | 6.26    | 5.03        |         |
| Intracellular transport                         | 17.79                       | 1.56    | 30.03    | 9.55    | 51.17       |         |
| Regulation of transport                         | 17.79                       | 8.86    | 21.25    | 3.99    | 5.28        | 2.43    |
| Lipid metabolic process                         | 17.16                       | 5.75    | 30.78    | 7.50    | 5.95        |         |
| Regulation of ion transport                     | 16.48                       | 8.45    | 16.24    | 3.68    | 5.34        | 1.75    |
| Protein localization to membrane                | 14.90                       | 2.39    | 14.44    |         | 37.67       |         |
| Intracellular protein transport                 | 14.87                       | 2.05    | 17.06    | 8.44    | 47.35       |         |
| Cell morphogenesis                              | 14.26                       | 5.30    | 15.76    |         | 3.03        |         |
| Cation transport                                | 13.85                       | 4.82    | 17.65    | 1.75    |             | 2.43    |
| Regulation of protein localization              | 13.36                       | 3.95    | 9.80     | 1.36    | 9.78        |         |
| Membrane organization                           | 13.33                       | 2.18    | 11.12    |         | 5.91        |         |
| Cellular response to DNA damage stimulus        | 13.10                       | 5.83    | 2.03     | 6.39    | 36.09       | 2.91    |
| Lipid biosynthetic process                      | 12.55                       | 4.97    | 21.28    | 1.87    | 1.58        |         |
| Positive regulation of ion transport            | 12.53                       | 5.02    | 8.11     | 2.93    | 1.71        |         |
| Organelle assembly                              | 12.51                       | 1.35    | 7.42     | 8.06    | 16.28       |         |
| Protein localization to organelle               | 12.43                       |         | 6.75     | 4.99    | 56.50       |         |
| Cytoskeleton organization                       | 12.33                       | 3.01    | 13.89    | 2.74    | 8.03        |         |
| Cellular amide metabolic process                | 12.04                       | 2.82    | 2.99     | 5.97    | 73.78       | 1.63    |
| Carbohydrate derivative biosynthetic process    | 11.90                       | 6.45    | 14.54    | 3.34    | 6.47        |         |
